# Supplementary material for: Visible-light photocatalytic hydrogen production in a narrow-bandgap semiconducting La/Ni-modified KNbO3 ferroelectric and further enhancement via high-field poling
Source: Royal Society of Chemistry journal article supplement (doi:10.1039/d1ta10330j), 2022-01-01
Supplement: d1ta10330j1.pdf [file d1ta10330j1.pdf]

## Supporting Information

### ***Visible-light Photocatalytic Hydrogen Production in A Narrow-bandgap Semiconducting La/Ni-modified KNbO<sub>3</sub> Ferroelectric and Further Enhancement via High-field Poling***

Wenbin Tang<sup>1</sup>, Xiaogang Xue<sup>1</sup>, Changlai Yuan<sup>†, 1, 2</sup>, Jun Chen<sup>†, 2</sup>, Lei Miao<sup>1, 3</sup>, Qin Feng<sup>4</sup>, Jiwen Xu<sup>1</sup>, Guanghui Rao<sup>†, 1</sup>, Jiang Wang<sup>1</sup>, Changrong Zhou<sup>1</sup>, Yiping Guo<sup>†</sup>

5

<sup>1</sup> Guangxi Key Laboratory of Information Materials, School of Material Science and Engineering, Guilin University of Electronic Technology, Guilin 541004, China

<sup>2</sup> School of Mathematics and Physics, University of Science and Technology Beijing, Beijing 100083, China

<sup>3</sup> Department of Materials Science and Engineering, SIT Research Laboratories, Innovative Global Program, Faculty of Engineering, Shibaura Institute of Technology, Tokyo 1358548, Japan

<sup>4</sup> School of Resources, Environment and Materials, Guangxi University, Nanning 530004, China

<sup>5</sup> State Key Laboratory of Metal Matrix Composites, School of Materials Science and Engineering, Shanghai Jiao Tong University, Shanghai 200240, China

†Corresponding authors. Changlai Yuan, Email: [yuanchanglai@guet.edu.cn](mailto:yuanchanglai@guet.edu.cn)

Jun Chen, Email: [junchen@ustb.edu.cn](mailto:junchen@ustb.edu.cn)

Guanghui Rao, Email: [rgh@guet.edu.cn](mailto:rgh@guet.edu.cn)

Yiping Guo, Email: [ypguo@sjtu.edu.cn](mailto:ypguo@sjtu.edu.cn)

**Table S1.** Unit cell parameters of (1-x) KN-xLN ceramics (x = 0.00–0.04) via refinement analysis

| Parameters               | x = 0.00                | x = 0.01                | x = 0.02                |                         | x = 0.03                |                         | x = 0.04                |                         |                     |
|--------------------------|-------------------------|-------------------------|-------------------------|-------------------------|-------------------------|-------------------------|-------------------------|-------------------------|---------------------|
| Sig                      | 1.01                    | 1.21                    | 1.38                    |                         | 1.86                    |                         | 1.54                    |                         |                     |
| R <sub>wp</sub> (%)      | 7.6                     | 7.9                     | 8.4                     |                         | 9.2                     |                         | 8.6                     |                         |                     |
| R <sub>b</sub> (%)       | 10.5                    | 11.4                    | 11.8                    |                         | 12.3                    |                         | 11.9                    |                         |                     |
| Space group              | Amm2                    | Amm2                    | P4mm                    | Amm2                    | P4mm                    | Amm2                    | P4mm                    | Amm2                    | P4mm                |
| Symmetry                 | O phase                 | O phase                 | T phase             |
| Phase fraction (%)       | 100                     | 95.61                   | 4.39                    | 93.81                   | 6.19                    | 91.49                   | 8.51                    | 89.92                   | 10.18               |
| a (Å)                    | 4.0040(0)               | 3.9902(5)               | 4.0584(8)               | 4.0012(1)               | 4.0398(1)               | 4.0005(5)               | 4.0444(5)               | 4.0078(8)               | 3.9549(8)           |
| b (Å)                    | 5.6817(0)               | 5.6791(6)               | 4.0584(8)               | 5.6763(0)               | 4.0398(1)               | 5.6930(2)               | 4.0444(5)               | 5.6717(7)               | 3.9549(9)           |
| c (Å)                    | 5.7040(0)               | 5.6935(6)               | 4.0704(1)               | 5.6870(3)               | 4.0616(0)               | 5.6749(1)               | 4.0605(9)               | 5.6680(0)               | 4.0520(5)           |
| c/a                      | 1.4246                  | 1.4268                  | 1.0029                  | 1.4213                  | 1.0053                  | 1.4185                  | 1.0039                  | 1.4142                  | 1.0245              |
| c/b                      | 1.0039                  | 1.0025                  | 1.0029                  | 1.0018                  | 1.0053                  | 0.9968                  | 1.0039                  | 0.9993                  | 1.0245              |
| α=β=γ (°)                | 90                      | 90                      | 90                      | 90                      | 90                      | 90                      | 90                      | 90                      | 90                  |
| Z                        | 2                       | 2                       | 1                       | 2                       | 1                       | 2                       | 1                       | 2                       | 1                   |
| V (Å <sup>3</sup> )      | 129.7633                | 129.0234                | 67.0449                 | 129.1645                | 66.2858                 | 129.2476                | 66.4217                 | 128.8441                | 63.3822             |
| δ                        | 0.0039                  | 0.0025                  | 0.0029                  | 0.0018                  | 0.0053                  | 0.0032                  | 0.0039                  | 0.0007                  | 0.0245              |
| Atomic positions         |                         |                         |                         |                         |                         |                         |                         |                         |                     |
| A atomic (x, y, z)       | (0, 0, 0.01380)         | (0, 0, 0.04216)         | (0, 0, 2.18600)         | (0, 0, 0.00699)         | (0, 0, 0.95489)         | (0, 0, 0.04766)         | (0, 0, 2.31954)         | (0, 0, -0.08279)        | (0, 0, 2.21600)     |
| B atomic (x, y, z)       | (0.5, 0, 0.5)           | (0.5, 0.56051)          | (0.5, 1.66769)          | (0.5, 0.52984)          | (0.5, 0.65545)          | (0.5, 0.56546)          | (0.5, 1.69745)          | (0.5, 0.43691)          | (0.5, 1.70769)      |
| O <sub>1</sub> (x, y, z) | (0, 0, 0.53640)         | (0, 0, 0.60503)         | (0.5, 0.5, 3.06799)     | (0, 0, 0.58847)         | (0.5, 0.5, 0.99635)     | (0, 0, 0.59546)         | (0.5, 0.5, 3.06682)     | (0, 0, 0.49480)         | (0.5, 0.5, 3.06690) |
| O <sub>2</sub> (x, y, z) | (0.5, 0.24760, 0.28420) | (0.5, 0.22269, 0.28051) | (0.5, 0.20965, 3.93449) | (0.5, 0.20965, 0.25060) | (0.5, 0.82920, 0.27815) | (0.5, 0.21529, 0.27815) | (0.5, 0.21529, 3.90580) | (0.5, 0.21211, 0.16024) | (0.5, 0, 3.91112)   |

## First principles calculation

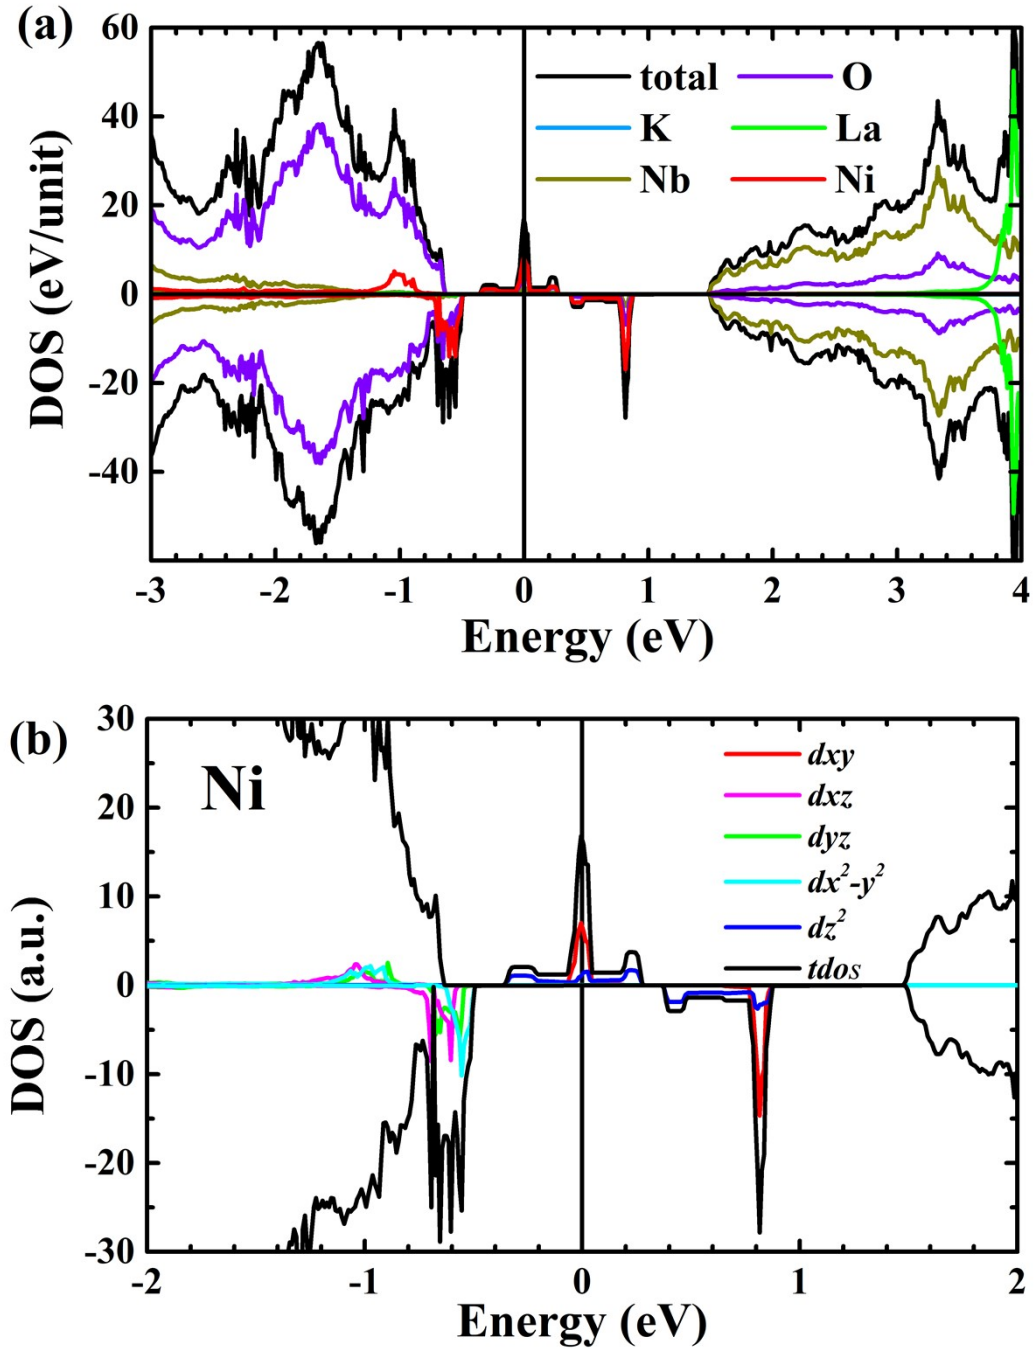

**Figure S1 (a) Density of states of 0.96KN-0.04LN unit cell, where Ni 3d functions as the midgap state between valence band maximum and conduction band minimum; (b) partial density of states of Ni 3d. In Figure S1a, an apparent midgap state of Ni 3d between VBM and CBM is observed in spin-down channels. The formation of NiO<sub>5</sub> complex induces additional splitting between  $d_{z^2}$  and  $d_{x^2-y^2}$  orbitals of double-degenerate states  $e_g$  as well as  $d_{xy}$  and  $d_{xz/yz}$  orbitals of threefold-degenerate states  $t_{2g}$  [1].**

A partial DOS calculation of spin-down Ni 3d state (Figure S1b) shows that the  $e_g$  state splits into half-filled  $d_z^2$  and  $d_{x^2-y^2}$ , and  $t_{2g}$  splits into filled states of  $d_{xy}$  and  $d_{xz/yz}$ . The calculation simultaneously demonstrates that interband transitions of three absorption peaks are derived from Ni  $3d_{x^2-y^2} \rightarrow Ni\ 3d_z^2 \rightarrow Ni\ 3d_{xy}$  transitions. When the photon energy reaches  $\sim 1.4$  eV, the electrons can be excited from VBM to Ni  $3d_z^2$ . Lower at  $\sim 0.6$  eV, the electrons in Ni  $3d_z^2$  orbital can have a transition to CBM. If photon energy of  $\sim 2.0$  eV in light irradiation is sufficiently absorbed, electrons of materials can be directly excited from VBM to CBM.

## XPS analysis and specific surface area

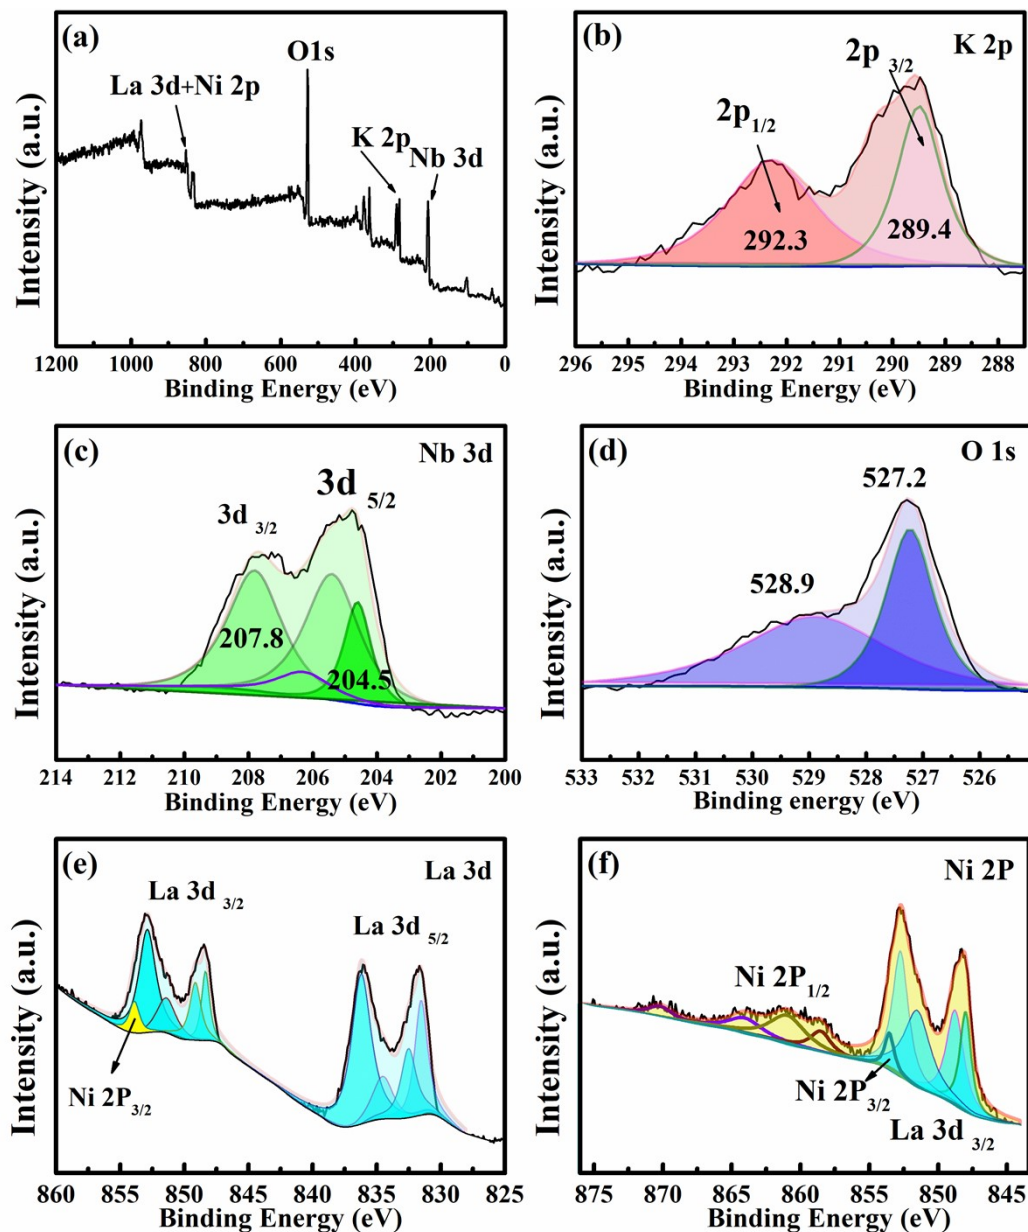

Figure S2 XPS spectra for (a) survey spectrum, (b) K 2P, (c) Nb 3d, (d) O 1s, (e) La 3d, and (f) Ni 2p of the 0.96KN-0.04LN ceramic. XPS spectra of the semiconducting 0.96KN-0.04LN sample are shown in Figure. S2a-f. As shown in Figure S2a, survey spectra confirm that K, Nb, O, La, and Ni elements exist in the sample. As shown in Figure S2b, two characteristic K2p<sub>3/2</sub> and 2p<sub>1/2</sub> peaks at 292.3 and 289.4 eV prove that K is in the +1 valence state. As shown in Figure S2c, two characteristic Nb 3d peaks located at 204.5 and 207.8 eV can be ascribed to Nb<sup>5+</sup> corresponding to the reported values in KNbO<sub>3</sub> [2]. O 1s spectra (Figure S2d) can be

divided into the following: (1) the peak at 527.2 eV is associated with the lattice oxygen at and (2) the peak at 528.9 eV is associated with oxygen vacancies at around [3, 4]. As shown in Figure S2e, two pairs of peaks located at 831.6 (836.0 eV) and 848.5.8 (852.9 eV) eV are individually determined as  $\text{La}^{3+} 3d_{5/2}$  and  $\text{La}^{3+} 3d_{3/2}$ , respectively. The Ni  $2p_{3/2}$  peak, which overlaps with the La  $3d_{3/2}$  peak (Figure. S2e and S2f), can be deconvoluted to the center at 853.9 eV, thereby indicating that the chemical state of Ni is +2. Three peaks located at 858.5, 861.0, and 864.0 eV can be assigned to Ni  $2p_{1/2}$ , thereby suggesting the +3 valance state of Ni. These findings are consistent with the results in the literature [4-6]. **When  $\text{Nb}^{5+}$  ions are replaced by  $\text{Ni}^{2+}$  ions, oxygen vacancy defects are formed in the 0.96KN–0.04LN lattice to maintain electric neutrality.** This result also revealed that the 0.96KN–0.04LN is defect-induced narrow-bandgap ferroelectric semiconductors. This result is similar to the findings in the literature [7, 8]. The ratio of  $\text{Ni}^{2+}$  and  $\text{Ni}^{3+}$  is estimated at 1:5.4 according to the ratio of peak area obtained from the fitting results. Therefore, the theoretical value of oxygen deficiency ( $\delta$ ) of the doping composition  $\text{LaNiO}_{3-\delta}$  is 0.08 and the specific formula of the 0.96KN–0.04LN sample is expressed as  $(\text{K}_{0.96}\text{La}_{0.04})(\text{Nb}_{0.96}, \text{Ni}_{0.04})\text{O}_{2.92}$ .

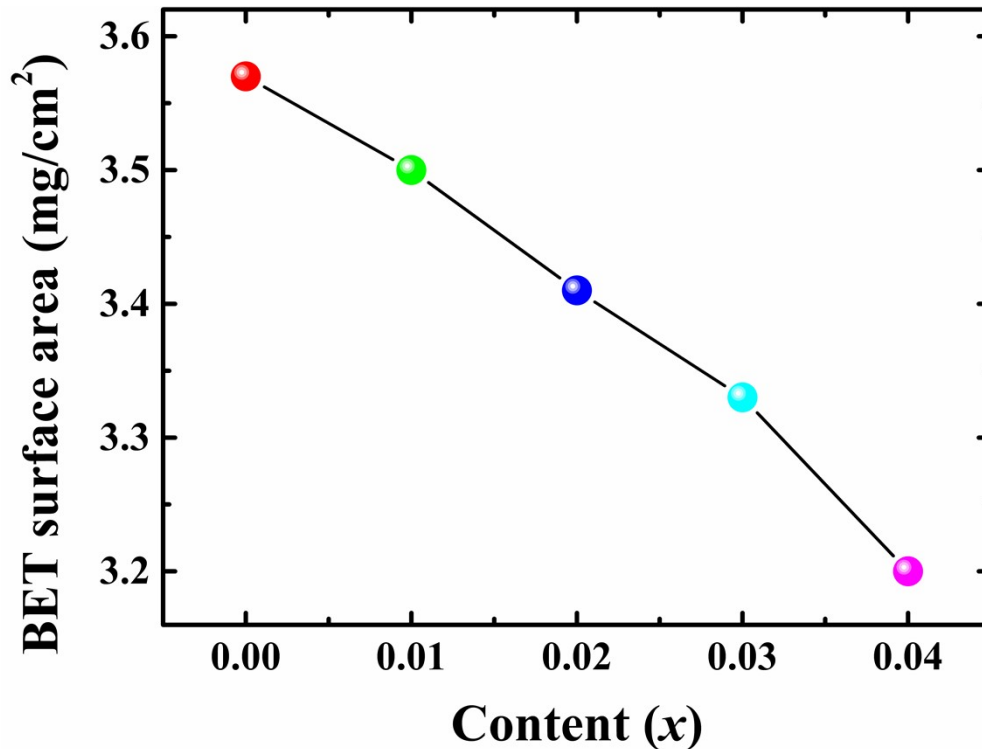

**Figure S3** Specific surface area of  $(1-x)\text{KN}-x\text{LN}$  ( $x = 0.00-0.04$ ) ceramics

## References

- [1] C.Q. Li, F. Wang, Y.Y. Sun, K. Jiang, S.J. Gong, Z.G. Hu, Z.Y. Zhou, X.L. Dong and J.H. Chu, *Phys. Rev. B*, 2018, **97**, 094109.
- [2] S. Si, H. Deng, W. Zhou, T. Wang, P. Yang and J. Chu, *Ceram. Int.*, 2018, **44**, 14638-14644.
- [3] Z. Chen, C. Yuan, X. Liu, L. Meng, S. Cheng, J. Xu, C. Zhou, J. Wang and G. Rao, *Mater. Sci. Semicond. Process*, 2020, **115**, 105089.
- [4] J. L. Lin, Z.J. Wang, X. Zhao and Z.D. Zhang, *Scr. Mater.*, 2020, **179**, 102-106.
- [5] X. Zhou, Y. Chen, C. Li, L. Zhang, X. Zhang, X. Ning, L. Zhan and J. Luo, *Sep. Purif. Technol.*, 2019, **211**, 179-188.
- [6] S. Yao, R. Zheng, R. Li, Y. Chen, X. Zhou and J. Luo, *J. Taiwan Inst. Chem. E*, 2019, **100**, 186-193.
- [7] I. Grinberg, D.V. West, M. Torres, G. Gou, D.M. Stein, L. Wu, G. Chen, E.M.

Gallo, A.R. Akbashev, P.K. Davies, J.E. Spanier and A.M. Rappe, Perovskite oxides for visible-light-absorbing ferroelectric and photovoltaic materials, *Nature*, 2013, **503**, 509-512.

[8] S. Chakraborty, and S. Mukherjee, *J. Aust. Ceram. Soc.*, 2017, **53**, 701-711.
